# Supplementary material for: Reinforcement of Nafion into polyacrylonitrile (PAN) to fabricate them into nanofiber mats by electrospinning: characterization of enhanced mechanical and adsorption properties
Source: Royal Society of Chemistry journal article supplement (doi:10.1039/c4ra05103c), 2014-08-06
Supplement: c4ra05103c1.pdf [file c4ra05103c1.pdf]

## Supporting Information

### **SEM Micrographs**

The SEM micrograph (5 $\mu$ m) of Nafion PAN 5:5 nanofibers depicts decrease in fiber diameter with increase in Nafion content. Also elongated beads on string are observed in the morphology.

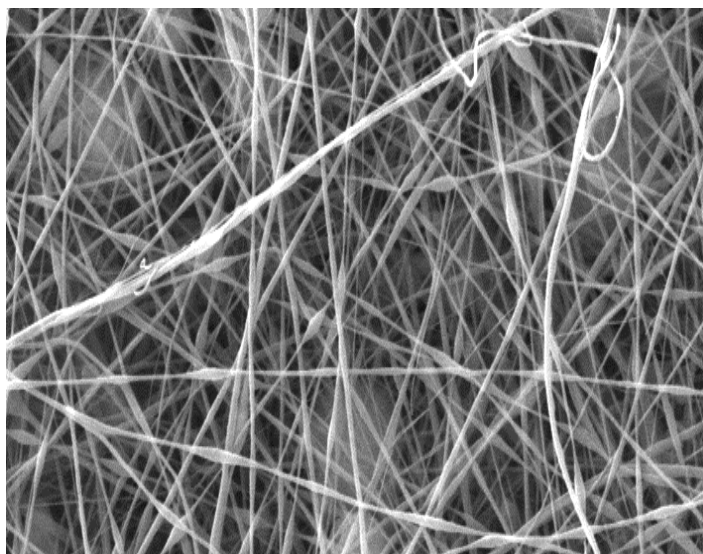

**Fig. 1. SEM micrograph (5 $\mu$ m) of Nafion/PAN (5:5) nanofibers**

### **Tensile strength analysis instrument**

The newly designed electronic polymer tensile strength testing machine by Shanghai Fa Rui Company FR-103C was used for experimental studies of accompanied manuscript.

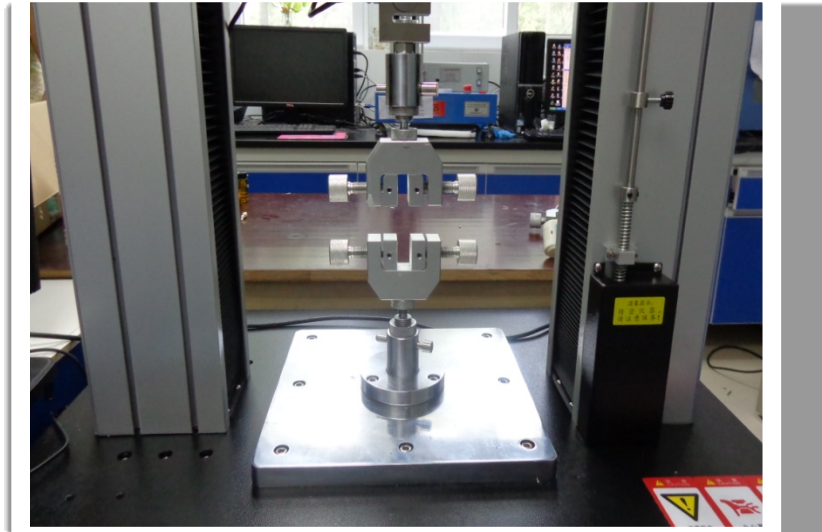

Fig.2. FR-103C, Tensile strength testing instrument
